# Supplementary material for: The first 2D trinuclear Cd(ii)-complex with adenine nucleobase: hydrothermal synthesis, crystal structure and fluorescent properties
Source: Royal Society of Chemistry journal article supplement (doi:10.1039/b712387f), 2007-01-01
Supplement: b712387f.pdf [file b712387f.pdf]

Supporting information

# The first 2D trinuclear Cd(II)-complex with adenine nucleobase: hydrothermal synthesis, crystal structure and fluorescent properties

En-Cui Yang, Hong-Kun Zhao, Bin Ding, Xiu-Guang Wang and Xiao-Jun Zhao \*

Table S1. Crystal Data and Structure Refinement of 1

|                                                                     |                                                                                      |
|---------------------------------------------------------------------|--------------------------------------------------------------------------------------|
| Formula                                                             | C <sub>11</sub> H <sub>15.5</sub> Cd <sub>1.5</sub> N <sub>5</sub> O <sub>5.75</sub> |
| Fw(g mol <sup>-1</sup> )                                            | 478.38                                                                               |
| Wavelength (Å)                                                      | 0.71073                                                                              |
| Crystal size(mm)                                                    | 0.35×0.24×0.20                                                                       |
| Crystal system                                                      | Monoclinic                                                                           |
| Space group                                                         | P2 <sub>1</sub> /c                                                                   |
| a (Å)                                                               | 9.250(2)                                                                             |
| b (Å)                                                               | 12.011(3)                                                                            |
| c (Å)                                                               | 14.326(4)                                                                            |
| β (°)                                                               | 92.618(3)                                                                            |
| V (Å <sup>3</sup> )                                                 | 1590.0(7)                                                                            |
| Z                                                                   | 4                                                                                    |
| θ range (°)                                                         | 2.21 – 25.00                                                                         |
| Index ranges                                                        | -10 ≤ h ≤ 11, -14 ≤ k ≤ 14, -17 ≤ l ≤ 9                                              |
| ρ (g cm <sup>-3</sup> )                                             | 1.998                                                                                |
| μ (mm <sup>-1</sup> )                                               | 2.061                                                                                |
| Reflections collected/ Unique                                       | 8203/2788 (R <sub>int</sub> = 0.0347)                                                |
| Data/restraints/parameters                                          | 2788 / 0 / 224                                                                       |
| GoF                                                                 | 1.034                                                                                |
| F(000)                                                              | 938                                                                                  |
| T/K                                                                 | 293(2)                                                                               |
| R <sub>1</sub> <sup>a</sup> /wR <sub>2</sub> <sup>b</sup> (I>2σ(I)) | 0.0362 / 0.0836                                                                      |
| R <sub>1</sub> /wR <sub>2</sub> (all data)                          | 0.0511 / 0.0917                                                                      |
| Largest diff. peak and hole (e.Å <sup>-3</sup> )                    | 0.595 and -0.889                                                                     |

<sup>a</sup>  $R_1 = \sum ||F_o| - |F_c|| / \sum |F_o|$ . <sup>b</sup>  $wR_2 = [\sum w(F_o^2 - F_c^2)^2 / \sum w(F_o^2)^2]^{1/2}$ .

**Table S2.** Selected Bond Distances (Å) and Angles (°)

|                                              |            |                                              |            |
|----------------------------------------------|------------|----------------------------------------------|------------|
| Cd(1)–N(7) <sup>#1</sup>                     | 2.282(4)   | Cd(2)–N(9) <sup>#2</sup>                     | 2.195(4)   |
| Cd(1)–N(3)                                   | 2.326(5)   | Cd(2)–N(9)                                   | 2.195(5)   |
| Cd(1)–O(4) <sup>#2</sup>                     | 2.389(4)   | Cd(2)–O(1) <sup>#2</sup>                     | 2.350(4)   |
| Cd(1)–O(1)                                   | 2.392(4)   | Cd(2)–O(1)                                   | 2.350(4)   |
| Cd(1)–O(5)                                   | 2.405(5)   | Cd(2)–O(4)                                   | 2.383(4)   |
| Cd(1)–O(2)                                   | 2.462(5)   | Cd(2)–O(4) <sup>#2</sup>                     | 2.383(4)   |
| Cd(1)–O(3) <sup>#2</sup>                     | 2.536(5)   |                                              |            |
|                                              |            |                                              |            |
| N(7) <sup>#1</sup> –Cd(1)–N(3)               | 104.52(16) | O(1)–Cd(1)–O(3) <sup>#2</sup>                | 125.56(15) |
| N(7) <sup>#1</sup> –Cd(1)–O(4) <sup>#2</sup> | 133.37(16) | O(5)–Cd(1)–O(3) <sup>#2</sup>                | 101.7(2)   |
| N(3)–Cd(1)–O(4) <sup>#2</sup>                | 93.28(16)  | O(2)–Cd(1)–O(3) <sup>#2</sup>                | 176.62(19) |
| N(7) <sup>#1</sup> –Cd(1)–O(1)               | 147.62(15) | N(9) <sup>#2</sup> –Cd(2)–N(9)               | 180.0(2)   |
| N(3)–Cd(1)–O(1)                              | 86.87(15)  | N(9) <sup>#2</sup> –Cd(2)–O(1) <sup>#2</sup> | 90.48(15)  |
| O(4) <sup>#2</sup> –Cd(1)–O(1)               | 74.48(14)  | N(9)–Cd(2)–O(1) <sup>#2</sup>                | 89.52(15)  |
| N(7) <sup>#1</sup> –Cd(1)–O(5)               | 84.69(18)  | N(9) <sup>#2</sup> –Cd(2)–O(1)               | 89.52(15)  |
| N(3)–Cd(1)–O(5)                              | 167.84(18) | N(9)–Cd(2)–O(1)                              | 90.48(15)  |
| O(4) <sup>#2</sup> –Cd(1)–O(5)               | 85.77(19)  | O(1) <sup>#2</sup> –Cd(2)–O(1)               | 180.000(1) |
| O(1)–Cd(1)–O(5)                              | 81.19(18)  | N(9) <sup>#2</sup> –Cd(2)–O(4)               | 89.93(17)  |
| N(7) <sup>#1</sup> –Cd(1)–O(2)               | 95.88(16)  | N(9)–Cd(2)–O(4)                              | 90.07(17)  |
| N(3)–Cd(1)–O(2)                              | 89.61(16)  | O(1) <sup>#2</sup> –Cd(2)–O(4)               | 75.35(15)  |
| O(4) <sup>#2</sup> –Cd(1)–O(2)               | 127.49(14) | O(1)–Cd(2)–O(4)                              | 104.65(15) |
| O(1)–Cd(1)–O(2)                              | 53.33(14)  | N(9) <sup>#2</sup> –Cd(2)–O(4) <sup>#2</sup> | 90.07(17)  |
| O(5)–Cd(1)–O(2)                              | 81.4(2)    | N(9)–Cd(2)–O(4) <sup>#2</sup>                | 89.93(17)  |
| N(7) <sup>#1</sup> –Cd(1)–O(3) <sup>#2</sup> | 85.77(16)  | O(1) <sup>#2</sup> –Cd(2)–O(4) <sup>#2</sup> | 104.65(15) |
| N(3)–Cd(1)–O(3) <sup>#2</sup>                | 87.1(2)    | O(1)–Cd(2)–O(4) <sup>#2</sup>                | 75.35(15)  |
| O(4) <sup>#2</sup> –Cd(1)–O(3) <sup>#2</sup> | 51.97(15)  | O(4)–Cd(2)–O(4) <sup>#2</sup>                | 180.000(1) |

Symmetry Codes: #1:  $x, -y + 3/2, z + 1/2$ ; #2:  $-x + 2, -y + 1, -z + 2$ .

**Table S3.** Selected Hydrogen Bond Lengths (Å) and Bond Angles (°) <sup>a</sup>

| D-H...A                               | <i>d</i> (D-H) | <i>d</i> (H...A) | <i>d</i> (D...A) | ∠DHA   |
|---------------------------------------|----------------|------------------|------------------|--------|
| O5-H5 <sup>1</sup> ...O6 <sup>a</sup> | 0.853          | 1.791            | 2.627(3)         | 166.18 |
| O5-H5 <sup>2</sup> ...O3 <sup>b</sup> | 0.851          | 2.007            | 2.848(5)         | 169.29 |
| N6-H6 <sup>1</sup> ...N1 <sup>c</sup> | 0.860          | 2.082            | 2.932(1)         | 169.70 |
| N6-H6 <sup>2</sup> ...O2 <sup>d</sup> | 0.860          | 1.966            | 2.813(2)         | 167.81 |

<sup>a</sup>  $x + 1, y, z + 1$ ; <sup>b</sup>  $x, -y + 1/2, z + 1/2$ ; <sup>c</sup>  $-x + 1, -y + 2, -z + 2$ ; <sup>d</sup>  $x, -y + 3/2, z - 1/2$ .

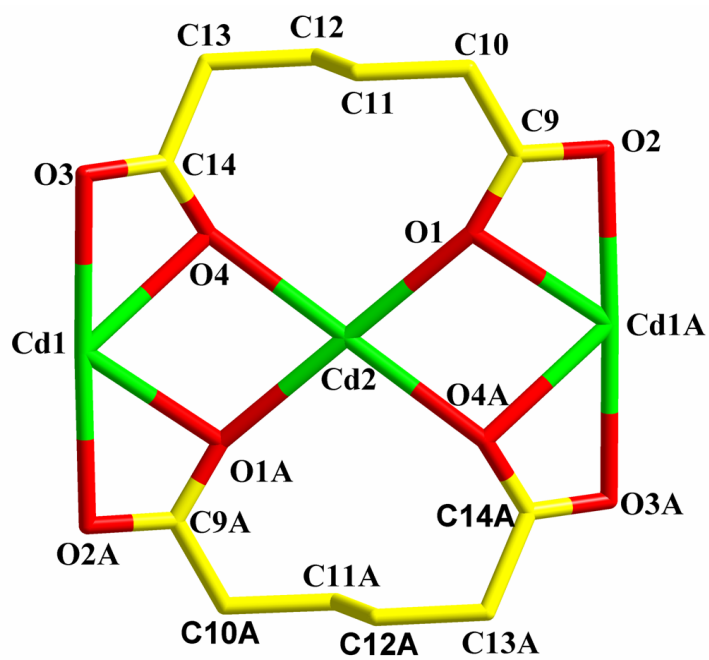

**Figure S1.** The unique plane formed by three Cd(II) centers and two ap ligands

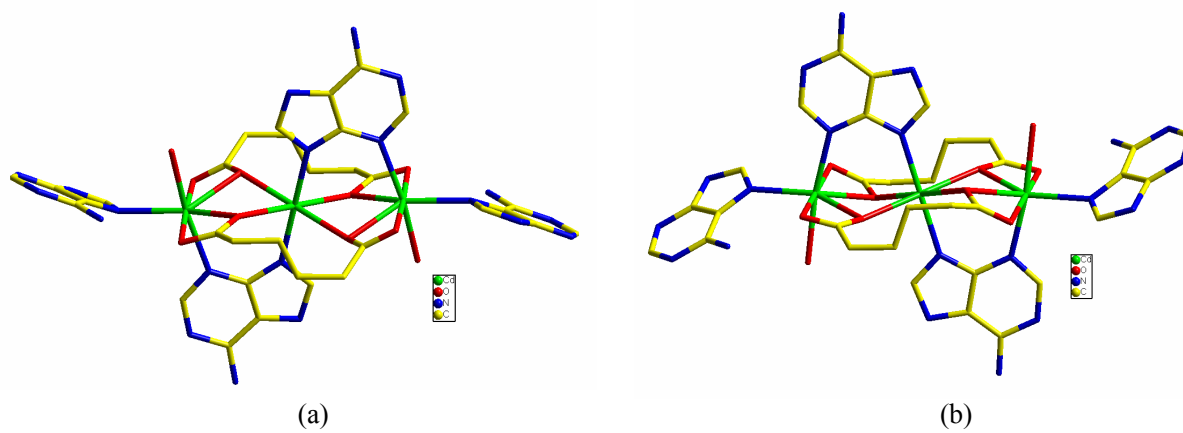

**Figure S2.** A local view of neighboring trinuclear Cd(II)-Ade-ap clusters by rotation exhibiting different geometries

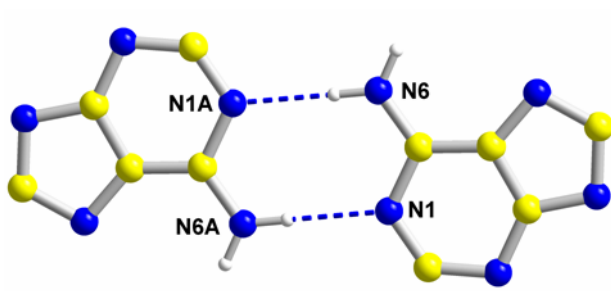

**Figure S3.** Pairs of “head to tail” N6–H6′⋯N1A base pair interactions

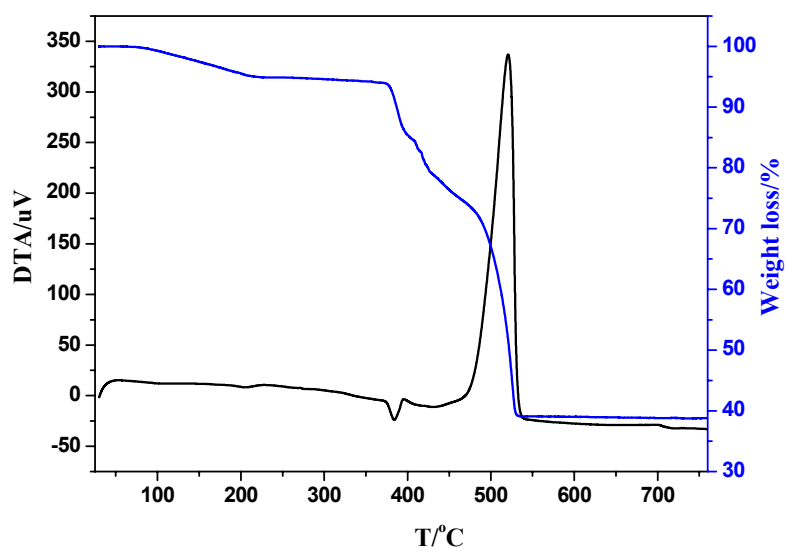

**Figure S4.** TGA and DTA curve of **1**
